# Supplementary material for: H2O2 and Engrailed 2 paracrine activity synergize to shape the zebrafish optic tectum
Source: PubMed Central journal article supplement (PMC7524761; doi:10.1038/s42003-020-01268-7), 2020-09-29
Supplement: 42003_2020_1268_MOESM2_ESM.pdf [file 42003_2020_1268_MOESM2_ESM.pdf]

## **Description of Additional Supplementary Files**

File Name: Supplementary Data 1

Description: Source data behind graphs
